# Supplementary material for: Anti-Metastatic Effect of Pyruvate Dehydrogenase Kinase 4 Inhibition in Bladder Cancer via the ERK, SRC, and JNK Pathways
Source: MDPI journal article supplement (doi:10.3390/ijms232113240), 2022-10-31
Supplement: s1 [file s1]

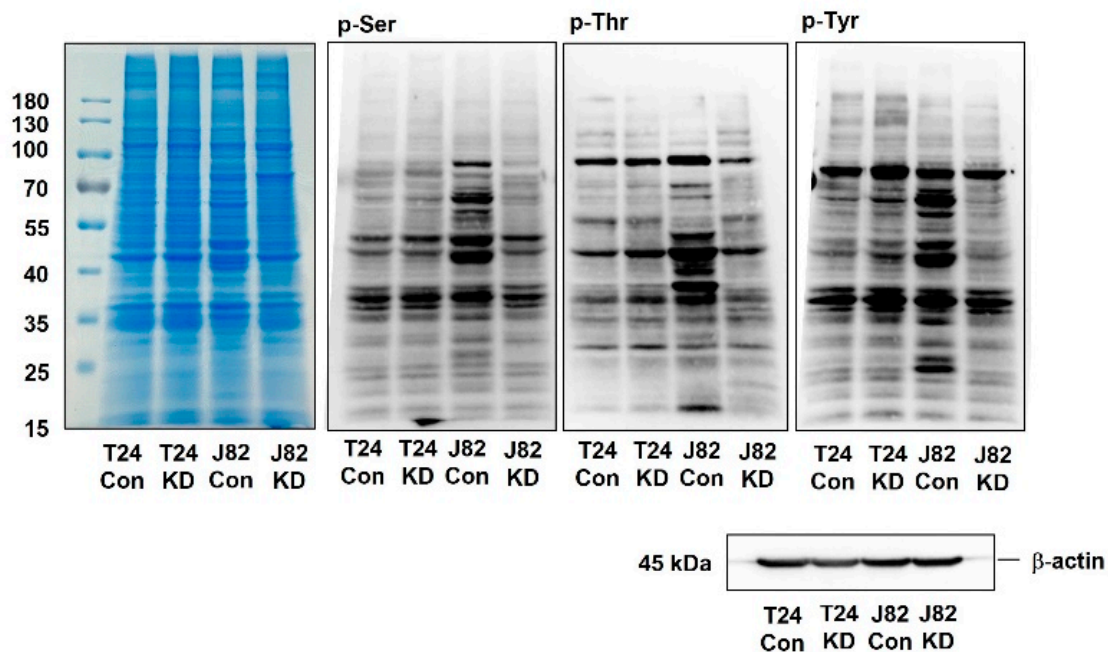

**Figure S1.** Screening of protein phosphorylation (S/T/Y) profiling in bladder cancer cell lines. Western blotting scanning in bladder cancer cells of phosphorylation that occurred on serine, threonine, and tyrosine. KD, knockdown; Control, wild-type.

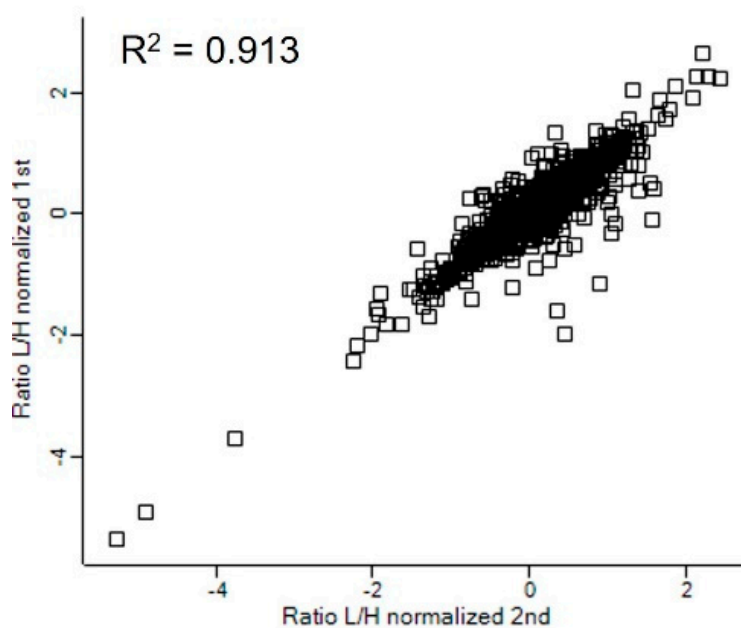

**Figure S2.** Phosphoproteomics correlation of bladder cancer. Pearson correlation of phosphoproteomes between technical samples.

**Table S1.** Summary of differentially expressed proteins.

| UniProt IDs | Protein Names                                                                                       | Gene Names |
|-------------|-----------------------------------------------------------------------------------------------------|------------|
| F8WF12      | Golgin subfamily B member 1                                                                         | GOLGB1     |
| P42677      | 40S ribosomal protein S27 (Metallopan-stimulin 1) (MPS-1)<br>(Small ribosomal subunit protein eS27) | RPS27      |
| H7C5M1      | RNA-binding protein 34 (Fragment)                                                                   | RBM34      |

|        |                                                                                                                                                                                                    |          |
|--------|----------------------------------------------------------------------------------------------------------------------------------------------------------------------------------------------------|----------|
| P10412 | Histone H1.4 (Histone H1b) (Histone H1s-4)                                                                                                                                                         | H1-4     |
| F2Z2T1 | Nuclear cap-binding protein subunit 1                                                                                                                                                              | NCBP1    |
| B1AMJ5 | CDK5 regulatory subunit-associated protein 2 (Fragment)                                                                                                                                            | CDK5RAP2 |
| K7EN42 | Glycylpeptide N-tetradecanoyltransferase 1 (Fragment)                                                                                                                                              | NMT1     |
| D6RI08 | OCIA domain-containing protein 1 (Fragment)                                                                                                                                                        | OCIAD1   |
| Q53EU6 | Glycerol-3-phosphate acyltransferase 3 (GPAT-3) (EC 2.3.1.15) (1-acyl-sn-glycerol-3-phosphate O-acyltransferase 10) (AGPAT 10)                                                                     | GPAT3    |
|        | (1-acyl-sn-glycerol-3-phosphate O-acyltransferase 9) (1-AGP acyltransferase 9) (1-AGPAT 9) (EC 2.3.1.51) (Acyl-CoA:glycerol-3-phosphate acyltransferase 3) (hGPAT3)                                |          |
|        | (Lung cancer metastasis-associated protein 1) (Lysophosphatidic acid acyltransferase theta) (LPAAT-theta) (MAG-1)                                                                                  |          |
| C9JEN3 | Protein lifeguard 3 (Fragment)                                                                                                                                                                     | TMBIM1   |
| F8WBL2 | Bystin                                                                                                                                                                                             | BYSL     |
| Q96RS0 | Trimethylguanosine synthase (EC 2.1.1.-) (CLL-associated antigen KW-2) (Cap-specific guanine-N2 methyltransferase) (Hepatocellular carcinoma-associated antigen 137)                               | TGS1     |
|        | (Nuclear receptor coactivator 6-interacting protein) (PRIP-interacting protein with methyltransferase motif) (PIMT) (PIPMT)                                                                        |          |
| J3KP30 | Deoxynucleotidyltransferase terminal-interacting protein 2                                                                                                                                         | DNTTIP2  |
| O75683 | Surfeit locus protein 6                                                                                                                                                                            | SURF6    |
| O95297 | Myelin protein zero-like protein 1 (Protein zero-related)                                                                                                                                          | MPZL1    |
| K7EPZ6 | Methyl-CpG-binding domain protein 1 (Fragment)                                                                                                                                                     | MBD1     |
| G5E9C0 | SP110 nuclear body protein, isoform CRA_b (Sp110 nuclear body protein)                                                                                                                             | SP110    |
| P07550 | Beta-2 adrenergic receptor (Beta-2 adrenoreceptor) (Beta-2 adrenoceptor)                                                                                                                           | ADRB2    |
| F8WBW8 | BAH and coiled-coil domain-containing protein 1                                                                                                                                                    | BAHCC1   |
| Q8NEF9 | Serum response factor-binding protein 1 (SRF-dependent transcription regulation-associated protein) (p49/STRAP)                                                                                    | SRFBP1   |
| E7ES96 | Presenilin (EC 3.4.23.-)                                                                                                                                                                           | PSEN1    |
| P28715 | DNA repair protein complementing XP-G cells (EC 3.1.-.-) (DNA excision repair protein ERCC-5) (Xeroderma pigmentosum group G-complementing protein)                                                | ERCC5    |
| F5H6E2 | Unconventional myosin-Ic                                                                                                                                                                           | MYO1C    |
| Q8TB61 | Adenosine 3'-phospho 5'-phosphosulfate transporter 1 (PAPS transporter 1) (Putative MAPK-activating protein PM15) (Putative NF-kappa-B-activating protein 48) (Solute carrier family 35 member B2) | SLC35B2  |
| O75151 | Lysine-specific demethylase PHF2 (EC 1.14.11.-) (GRC5) (PHD finger protein 2)                                                                                                                      | PHF2     |
| Q13206 | Probable ATP-dependent RNA helicase DDX10 (EC 3.6.4.13) (DEAD box protein 10)                                                                                                                      | DDX10    |
| O95453 | Poly(A)-specific ribonuclease PARN (EC 3.1.13.4) (Deadenylating nuclease) (Deadenylation nuclease) (Polyadenylate-specific ribonuclease)                                                           | PARN     |
| Q9ULF5 | Zinc transporter ZIP10 (Solute carrier family 39 member 10) (Zrt- and Irt-like protein 10) (ZIP-10)                                                                                                | SLC39A10 |
| B4DTR1 | Receptor tyrosine-protein kinase erbB-2 (cDNA FLJ59426, highly similar to Receptor tyrosine-protein kinase erbB-2)                                                                                 | ERBB2    |
| Q13206 | Probable ATP-dependent RNA helicase DDX10 (EC 3.6.4.13) (DEAD box protein 10)                                                                                                                      | DDX10    |
| Q13428 | Treacle protein (Treacher Collins syndrome protein)                                                                                                                                                | TCOF1    |
| E9PFD7 | Receptor protein-tyrosine kinase (EC 2.7.10.1)                                                                                                                                                     | EGFR     |
| Q92508 | Piezo-type mechanosensitive ion channel component 1 (Membrane protein induced by beta-amyloid treatment) (Mib) (Protein FAM38A)                                                                    | PIEZO1   |
| Q92508 | Piezo-type mechanosensitive ion channel component 1 (Membrane protein induced by beta-amyloid treatment) (Mib) (Protein FAM38A)                                                                    | PIEZO1   |
| O00161 | Synaptosomal-associated protein 23 (SNAP-23) (Vesicle-membrane fusion protein SNAP-23)                                                                                                             | SNAP23   |
| O00161 | Synaptosomal-associated protein 23 (SNAP-23) (Vesicle-membrane fusion protein SNAP-23)                                                                                                             | SNAP23   |
| J3QSV6 | Ribosomal L1 domain-containing protein 1 (Fragment)                                                                                                                                                | RSL1D1   |
| P46821 | Microtubule-associated protein 1B (MAP-1B)                                                                                                                                                         | MAP1B    |
| J3QSV6 | [Cleaved into: MAP1B heavy chain; MAP1 light chain LC1]                                                                                                                                            |          |
| J3QSV6 | Ribosomal L1 domain-containing protein 1 (Fragment)                                                                                                                                                | RSL1D1   |
| O00161 | Synaptosomal-associated protein 23 (SNAP-23) (Vesicle-membrane fusion protein SNAP-23)                                                                                                             | SNAP23   |

|            |                                                                                                                                                                                                                                                                                                                                                                          |          |
|------------|--------------------------------------------------------------------------------------------------------------------------------------------------------------------------------------------------------------------------------------------------------------------------------------------------------------------------------------------------------------------------|----------|
| O43707     | Alpha-actinin-4 (Non-muscle alpha-actinin 4)                                                                                                                                                                                                                                                                                                                             | ACTN4    |
| Q9H3N1     | Thioredoxin-related transmembrane protein 1 (Thioredoxin domain-containing protein 1) (Transmembrane Trx-related protein)                                                                                                                                                                                                                                                | TMX1     |
| Q9BQG0     | Myb-binding protein 1A                                                                                                                                                                                                                                                                                                                                                   | MYBBP1A  |
| Q9H6F5     | Coiled-coil domain-containing protein 86 (Cytokine-induced protein with coiled-coil domain)                                                                                                                                                                                                                                                                              | CCDC86   |
| A0A0G2JNZ2 | Protein scribble homolog                                                                                                                                                                                                                                                                                                                                                 | SCRIB    |
| A0A0G2JNZ2 | Protein scribble homolog                                                                                                                                                                                                                                                                                                                                                 | SCRIB    |
| A0A2U3TZL8 | Kinesin-like protein                                                                                                                                                                                                                                                                                                                                                     | KIF23    |
| P07355     | Annexin A2 (Annexin II) (Annexin-2) (Calpactin I heavy chain) (Calpactin-1 heavy chain) (Chromobindin-8) (Lipocortin II) (Placental anticoagulant protein IV) (PAP-IV) (Protein I) (p36)                                                                                                                                                                                 | ANXA2    |
| P07355     | Annexin A2 (Annexin II) (Annexin-2) (Calpactin I heavy chain) (Calpactin-1 heavy chain) (Chromobindin-8) (Lipocortin II) (Placental anticoagulant protein IV) (PAP-IV) (Protein I) (p36)                                                                                                                                                                                 | ANXA2    |
| Q96PD2     | Discoidin, CUB and LCCL domain-containing protein 2 (CUB, LCCL and coagulation factor V/VIII-homology domains protein 1) (Endothelial and smooth muscle cell-derived neuropilin-like protein)                                                                                                                                                                            | DCBLD2   |
| P20337     | Ras-related protein Rab-3B                                                                                                                                                                                                                                                                                                                                               | RAB3B    |
| Q9BVJ6     | U3 small nucleolar RNA-associated protein 14 homolog A (Antigen NY-CO-16) (Serologically defined colon cancer antigen 16)                                                                                                                                                                                                                                                | UTP14A   |
| Q9BQG0     | Myb-binding protein 1A                                                                                                                                                                                                                                                                                                                                                   | MYBBP1A  |
| Q6ZRP7     | Sulfhydryl oxidase 2 (EC 1.8.3.2) (Neuroblastoma-derived sulfhydryl oxidase) (Quiescin Q6-like protein 1)                                                                                                                                                                                                                                                                | QSOX2    |
| Q8IWS0     | PHD finger protein 6 (PHD-like zinc finger protein)                                                                                                                                                                                                                                                                                                                      | PHF6     |
| P46013     | Proliferation marker protein Ki-67 (Antigen identified by monoclonal antibody Ki-67) (Antigen KI-67) (Antigen Ki67)                                                                                                                                                                                                                                                      | MKI67    |
| Q13501     | Sequestosome-1 (EBI3-associated protein of 60 kDa) (EBIAP) (p60) (Phosphotyrosine-independent ligand for the Lck SH2 domain of 62 kDa) (Ubiquitin-binding protein p62)                                                                                                                                                                                                   | SQSTM1   |
| Q8WYP5     | Protein ELYS (Embryonic large molecule derived from yolk sac) (Protein MEL-28) (Putative AT-hook-containing transcription factor 1)                                                                                                                                                                                                                                      | AHCTF1   |
| Q9NR30     | Nucleolar RNA helicase 2 (EC 3.6.4.13) (DEAD box protein 21) (Gu-alpha) (Nucleolar RNA helicase Gu) (Nucleolar RNA helicase II) (RH II/Gu)                                                                                                                                                                                                                               | DDX21    |
| P02545     | Prelamin-A/C [Cleaved into: Lamin-A/C (70 kDa lamin) (Renal carcinoma antigen NY-REN-32)]                                                                                                                                                                                                                                                                                | LMNA     |
| Q8N556     | Actin filament-associated protein 1 (110 kDa actin filament-associated protein) (AFAP-110)                                                                                                                                                                                                                                                                               | AFAP1    |
| Q8NFH5     | Nucleoporin NUP35 (35 kDa nucleoporin) (Mitotic phosphoprotein 44) (MP-44) (Nuclear pore complex protein Nup53) (Nucleoporin NUP53)                                                                                                                                                                                                                                      | NUP35    |
| P49006     | MARCKS-related protein (MARCKS-like protein 1) (Macrophage myristoylated alanine-rich C kinase substrate) (Mac-MARCKS) (MacMARCKS)                                                                                                                                                                                                                                       | MARCKSL1 |
| P11388     | DNA topoisomerase 2-alpha (EC 5.6.2.2) (DNA topoisomerase II, alpha isozyme)                                                                                                                                                                                                                                                                                             | TOP2A    |
| P02545     | Prelamin-A/C [Cleaved into: Lamin-A/C (70 kDa lamin) (Renal carcinoma antigen NY-REN-32)]                                                                                                                                                                                                                                                                                | LMNA     |
| P20700     | Lamin-B1                                                                                                                                                                                                                                                                                                                                                                 | LMNB1    |
| Q09666     | Neuroblast differentiation-associated protein AHNAK (Desmoyokin)                                                                                                                                                                                                                                                                                                         | AHNAK    |
| P46087     | Probable 28S rRNA (cytosine(4447)-C(5))-methyltransferase (EC 2.1.1.-) (Nucleolar protein 1) (Nucleolar protein 2 homolog) (Proliferating-cell nucleolar antigen p120) (Proliferation-associated nucleolar protein p120)                                                                                                                                                 | NOP2     |
| Q9UQ35     | Serine/arginine repetitive matrix protein 2 (300 kDa nuclear matrix antigen) (Serine/arginine-rich splicing factor-related nuclear matrix protein of 300 kDa) (SR-related nuclear matrix protein of 300 kDa) (Ser/Arg-related nuclear matrix protein of 300 kDa) (Splicing coactivator subunit SRm300) (Tax-responsive enhancer element-binding protein 803) (TaxREB803) | SRRM2    |
| Q09666     | Neuroblast differentiation-associated protein AHNAK (Desmoyokin)                                                                                                                                                                                                                                                                                                         | AHNAK    |
| Q9P2E9     | Ribosome-binding protein 1 (180 kDa ribosome receptor homolog) (RRp) (ES/130-related protein) (Ribosome receptor protein)                                                                                                                                                                                                                                                | RRBP1    |
| Q09666     | Neuroblast differentiation-associated protein AHNAK (Desmoyokin)                                                                                                                                                                                                                                                                                                         | AHNAK    |

|            |                                                                                                                                                                                             |         |
|------------|---------------------------------------------------------------------------------------------------------------------------------------------------------------------------------------------|---------|
| F8W6I7     | Helix-destabilizing protein (Heterogeneous nuclear ribonucleoprotein A1)<br>(Heterogeneous nuclear ribonucleoprotein A1, N-terminally processed) (hnRNP core protein A1)                    | HNRNPA1 |
| Q9H6F5     | Coiled-coil domain-containing protein 86<br>(Cytokine-induced protein with coiled-coil domain)                                                                                              | CCDC86  |
| P07355     | Annexin A2 (Annexin II) (Annexin-2) (Calpactin I heavy chain) (Calpactin-1 heavy chain)<br>(Chromobindin-8) (Lipocortin II) (Placental anticoagulant protein IV) (PAP-IV) (Protein I) (p36) | ANXA2   |
| O94804     | Serine/threonine-protein kinase 10 (EC 2.7.11.1)<br>(Lymphocyte-oriented kinase)                                                                                                            | STK10   |
| A0A087WWP4 | RNA-binding protein 15                                                                                                                                                                      | RBM15   |
| A0A087WWP4 | RNA-binding protein 15                                                                                                                                                                      | RBM15   |
| P16401     | Histone H1.5 (Histone H1a) (Histone H1b) (Histone H1s-3)                                                                                                                                    | H1-5    |

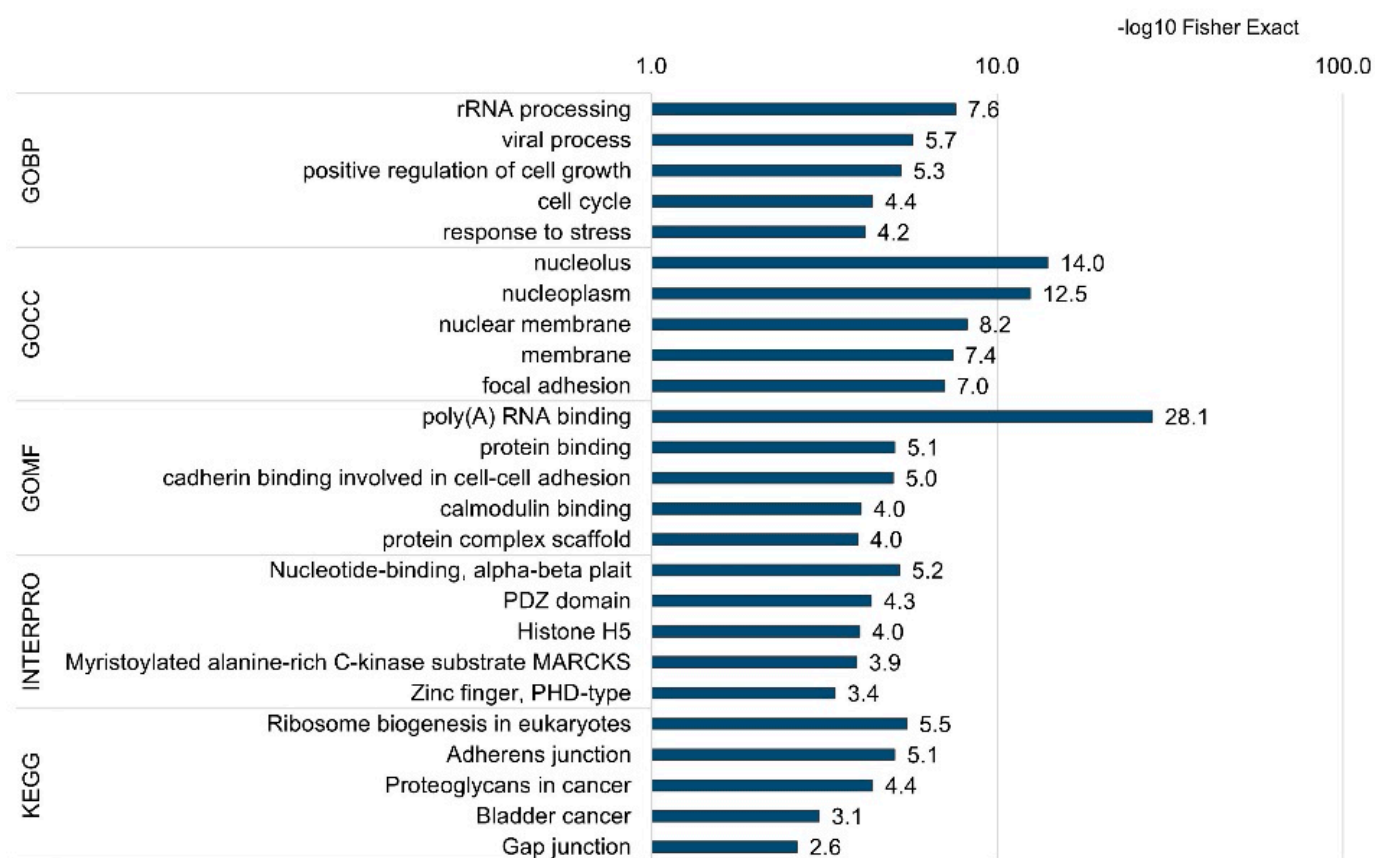

**Figure S3.** DAVID analysis of differentially expressed proteins. Downregulated phosphoproteins. GOBP, Gene Ontology Biological Process; CC: cellular component; MF, molecular function; KEGG, Kyoto Encyclopedia of Genes and Genomes.
